# Supplementary material for: High-confidence mapping of chemical compounds and protein complexes reveals novel aspects of chemical stress response in yeast
Source: Royal Society of Chemistry journal article supplement (doi:10.1039/b911821g), 2009-01-01
Supplement: cpcnet_additional_file3.pdf [file cpcnet_additional_file3.pdf]

## Additional table

The protein complexes were manually annotated in the defined categories. The color codes are the same used in figure 1.

| <b>Protein complex</b>                                       | <b>Category</b>          |
|--------------------------------------------------------------|--------------------------|
| prefoldin complex                                            | Cytoskeleton-related     |
| chaperonin-containing T-complex                              | Cytoskeleton-related     |
| Arp2/3 protein complex                                       | Cytoskeleton-related     |
| Golgi transport complex                                      | Golgi/vacuolar/vesicular |
| alpha-1,6-mannosyltransferase complex(Anp1p/Mnn9p)           | Golgi/vacuolar/vesicular |
| retromer complex                                             | Golgi/vacuolar/vesicular |
| ESCRT I complex                                              | Golgi/vacuolar/vesicular |
| H <sup>+</sup> -transporting ATPase, vacuolar                | Golgi/vacuolar/vesicular |
| H <sup>+</sup> -transporting ATPase, Golgi                   | Golgi/vacuolar/vesicular |
| CORVET complex                                               | Golgi/vacuolar/vesicular |
| HOPS complex                                                 | Golgi/vacuolar/vesicular |
| ESCRT III complex                                            | Golgi/vacuolar/vesicular |
| Exocyst complex                                              | Golgi/vacuolar/vesicular |
| OCA complex                                                  | Golgi/vacuolar/vesicular |
| COPI                                                         | Golgi/vacuolar/vesicular |
| AP-1 adaptor complex                                         | Golgi/vacuolar/vesicular |
| AP-2 adaptor complex                                         | Golgi/vacuolar/vesicular |
| GSE Complex                                                  | Golgi/vacuolar/vesicular |
| AP-3 adaptor complex                                         | Golgi/vacuolar/vesicular |
| TRAPP complex                                                | Golgi/vacuolar/vesicular |
| cytoplasmic ribosomal large subunit                          | Translation machinery    |
| mitochondrial ribosomal small subunit                        | Translation machinery    |
| cytoplasmic ribosomal small subunit                          | Translation machinery    |
| mitochondrial ribosomal large subunit                        | Translation machinery    |
| eIF2B                                                        | Translation machinery    |
| Cytoplasmic exosome complex                                  | RNA processing           |
| mRNA cleavage and polyadenylation specificity factor complex | RNA processing           |
| ribonuclease MRP complex                                     | RNA processing           |
| nucleolar ribonuclease P complex                             | RNA processing           |
| Prp19-associated complex                                     | RNA processing           |
| Nuclear exosome complex                                      | RNA processing           |
| DNA-directed RNA polymerase III complex                      | Chromatin dynamics       |
| DNA-directed RNA polymerase I complex                        | Chromatin dynamics       |
| NuA4 histone acetyltransferase complex                       | Chromatin dynamics       |
| COMPASS complex                                              | Chromatin dynamics       |
| RSC complex                                                  | Chromatin dynamics       |

|                                                  |                    |
|--------------------------------------------------|--------------------|
| Elongator complex                                | Chromatin dynamics |
| SAGA complex                                     | Chromatin dynamics |
| HIR complex                                      | Chromatin dynamics |
| Swr1p complex                                    | Chromatin dynamics |
| Ada2p/Gcn5p/Ada3 transcription activator complex | Chromatin dynamics |
| Kornberg's mediator (SRB) complex                | Chromatin dynamics |
| THO complex                                      | Chromatin dynamics |
| CCR4-NOT core complex                            | Chromatin dynamics |
| SLIK (SAGA-like) complex                         | Chromatin dynamics |
| transcription factor TFIID complex               | Chromatin dynamics |
| Rpd3L complex                                    | Chromatin dynamics |
| Set3p complex                                    | Chromatin dynamics |
| 20S proteasome                                   | Proteasome         |
| FBP degradation complex                          | Proteasome         |
| 19/22S regulator                                 | Proteasome         |
